# Supplementary material
Source: MDPI journal article supplement (https://www.mdpi.com/2073-4395/12/5/1157)
Supplement: s1 [file s1]

**Table S1** Combined analysis of variances and AMMI stability model

| Trait         | Factors                | Df  | Sum Sq    | Mean Sq   | F value | Pr(>F)   |     |
|---------------|------------------------|-----|-----------|-----------|---------|----------|-----|
| Plant height  | Genotype               | 6   | 20140.76  | 3356.79   | 79.87   | 1.07E-52 | *** |
|               | Location               | 7   | 3339.16   | 477.02    | 11.35   | 2.76E-12 | *** |
|               | Year                   | 1   | 420.54    | 420.54    | 10.01   | 0.001778 | **  |
|               | Genotype:Location      | 42  | 4131.36   | 98.37     | 2.34    | 3.78E-05 | *** |
|               | Genotype:Year          | 6   | 1676.38   | 279.40    | 6.65    | 1.76E-06 | *** |
|               | Location:Year          | 7   | 3133.20   | 447.60    | 10.65   | 1.52E-11 | *** |
|               | Genotype:Location:Year | 42  | 5079.32   | 120.94    | 2.88    | 2.84E-07 | *** |
|               | Residuals              | 222 | 9330.29   | 42.03     |         |          |     |
| Tillers/plant | Genotype               | 6   | 237.58    | 39.60     | 4.05    | 0.000707 | *** |
|               | Location               | 7   | 4743.41   | 677.63    | 69.37   | 2.12E-52 | *** |
|               | Year                   | 1   | 50.26     | 50.26     | 5.14    | 0.024278 | *   |
|               | Genotype:Location      | 42  | 724.65    | 17.25     | 1.77    | 0.004774 | **  |
|               | Genotype:Year          | 6   | 117.05    | 19.51     | 2.00    | 0.067205 | .   |
|               | Location:Year          | 7   | 3067.65   | 438.24    | 44.86   | 3.47E-39 | *** |
|               | Genotype:Location:Year | 42  | 764.34    | 18.20     | 1.86    | 0.002219 | **  |
|               | Residuals              | 222 | 2168.70   | 9.77      |         |          |     |
| Grain yield   | Genotype               | 6   | 8825.92   | 1470.99   | 17.11   | 3.14E-16 | *** |
|               | Location               | 7   | 105443.04 | 15063.29  | 175.18  | 1.05E-86 | *** |
|               | Year                   | 1   | 63488.71  | 63488.71  | 738.34  | 1.52E-72 | *** |
|               | Genotype:Location      | 42  | 13218.97  | 314.74    | 3.66    | 1.97E-10 | *** |
|               | Genotype:Year          | 6   | 1870.46   | 311.74    | 3.63    | 0.001883 | **  |
|               | Location:Year          | 7   | 10947.21  | 1563.89   | 18.19   | 4.77E-19 | *** |
|               | Genotype:Location:Year | 42  | 9342.23   | 222.43    | 2.59    | 4.11E-06 | *** |
|               | Residuals              | 222 | 19089.35  | 85.99     |         |          |     |
| Straw yield   | Genotype               | 6   | 47330.00  | 7888.33   | 16.31   | 1.54E-15 | *** |
|               | Location               | 7   | 296364.52 | 42337.79  | 87.52   | 2.74E-60 | *** |
|               | Year                   | 1   | 110145.75 | 110145.75 | 227.68  | 7.03E-36 | *** |
|               | Genotype:Location      | 42  | 58183.81  | 1385.33   | 2.86    | 3.23E-07 | *** |
|               | Genotype:Year          | 6   | 9030.51   | 1505.09   | 3.11    | 0.006028 | **  |
|               | Location:Year          | 7   | 79559.42  | 11365.63  | 23.49   | 9.36E-24 | *** |
|               | Genotype:Location:Year | 42  | 98556.21  | 2346.58   | 4.85    | 3.97E-15 | *** |
|               | Residuals              | 222 | 107398.57 | 483.78    |         |          |     |

AMMI analysis for year 2020:

Response: Plant height

| Source    | Df  | Sum Sq   | Mean Sq | F value | Pr(>F)  | Proportion | Accumulated |
|-----------|-----|----------|---------|---------|---------|------------|-------------|
| ENV       | 7   | 2634.01  | 376.29  | 6.47    | 0.001   |            |             |
| REP(ENV)  | 16  | 930.50   | 58.16   | 1.89    | 0.031   |            |             |
| GEN       | 6   | 15751.74 | 2625.29 | 85.13   | 3.2E-36 |            |             |
| GEN:ENV   | 42  | 3091.03  | 73.60   | 2.39    | 0.00024 |            |             |
| PC1       | 12  | 1797.90  | 149.82  | 4.86    | 0       | 58.2       | 58.2        |
| PC2       | 10  | 702.12   | 70.21   | 2.28    | 0.02    | 22.7       | 80.9        |
| PC3       | 8   | 440.80   | 55.10   | 1.79    | 0.09    | 14.3       | 95.1        |
| PC4       | 6   | 100.37   | 16.73   | 0.54    | 0.78    | 3.2        | 98.4        |
| PC5       | 4   | 31.57    | 7.89    | 0.26    | 0.90    | 1          | 99.4        |
| PC6       | 2   | 18.27    | 9.14    | 0.30    | 0.74    | 0.6        | 100         |
| Residuals | 96  | 2960.40  | 30.84   |         |         |            |             |
| Total     | 209 | 28458.72 | 136.17  |         |         |            |             |

Response: Tiller/plant

| Source    | Df  | Sum Sq  | Mean Sq | F value | Pr(>F)   | Proportion | Accumulated |
|-----------|-----|---------|---------|---------|----------|------------|-------------|
| ENV       | 7   | 2740.74 | 391.53  | 43.54   | 3.04E-09 |            |             |
| REP(ENV)  | 16  | 143.89  | 8.99    | 1.22    | 0.269    |            |             |
| GEN       | 6   | 142.49  | 23.75   | 3.22    | 0.006    |            |             |
| GEN:ENV   | 42  | 659.98  | 15.71   | 2.13    | 0.001    |            |             |
| PC1       | 12  | 283.96  | 23.66   | 3.20    | 0.001    | 43         | 43          |
| PC2       | 10  | 198.49  | 19.85   | 2.69    | 0.006    | 30.1       | 73.1        |
| PC3       | 8   | 104.75  | 13.09   | 1.77    | 0.092    | 15.9       | 89          |
| PC4       | 6   | 59.82   | 9.97    | 1.35    | 0.243    | 9.1        | 98          |
| PC5       | 4   | 12.28   | 3.07    | 0.42    | 0.794    | 1.9        | 99.9        |
| PC6       | 2   | 0.67    | 0.34    | 0.05    | 0.951    | 0.1        | 100         |
| Residuals | 96  | 709.07  | 7.39    |         |          |            |             |
| Total     | 209 | 5056.15 | 24.19   |         |          |            |             |

Response: Grain yield

| Source   | Df | Sum Sq   | Mean Sq | F value | Pr(>F)  | Proportion | Accumulated |
|----------|----|----------|---------|---------|---------|------------|-------------|
| ENV      | 7  | 58827.33 | 8403.90 | 30.33   | 4.4E-08 |            |             |
| REP(ENV) | 16 | 4433.97  | 277.12  | 3.64    | 3.7E-05 |            |             |
| GEN      | 6  | 8742.58  | 1457.10 | 19.15   | 1.5E-14 |            |             |

|           |     |           |        |      |         |      |      |
|-----------|-----|-----------|--------|------|---------|------|------|
| GEN:ENV   | 42  | 15865.46  | 377.75 | 4.96 | 4.5E-11 |      |      |
| PC1       | 12  | 8506.78   | 708.90 | 9.32 | 0       | 53.6 | 53.6 |
| PC2       | 10  | 3614.56   | 361.46 | 4.75 | 0       | 22.8 | 76.4 |
| PC3       | 8   | 1992.36   | 249.05 | 3.27 | 0.002   | 12.6 | 89   |
| PC4       | 6   | 1108.95   | 184.82 | 2.43 | 0.03    | 7    | 95.9 |
| PC5       | 4   | 613.59    | 153.40 | 2.02 | 0.10    | 3.9  | 99.8 |
| PC6       | 2   | 29.22     | 14.61  | 0.19 | 0.83    | 0.2  | 100  |
| Residuals | 96  | 7305.66   | 76.10  |      |         |      |      |
| Total     | 209 | 111040.46 | 531.29 |      |         |      |      |

Response: Straw yield

| Source    | Df | Sum Sq    | Mean Sq  | F value | Pr(>F)  | Proportion | Accumulated |
|-----------|----|-----------|----------|---------|---------|------------|-------------|
| ENV       | 7  | 172993.65 | 24713.38 | 23.72   | 2.6E-07 |            |             |
| REP(ENV)  | 16 | 16667.75  | 1041.73  | 1.38    | 1.7E-01 |            |             |
| GEN       | 6  | 44552.95  | 7425.49  | 9.84    | 1.9E-08 |            |             |
| GEN:ENV   | 42 | 105432.40 | 2510.30  | 3.33    | 6.1E-07 |            |             |
| PC1       | 12 | 46688.06  | 3890.67  | 5.16    | 0       | 44.3       | 44.3        |
| PC2       | 10 | 42681.10  | 4268.11  | 5.66    | 0       | 40.5       | 84.8        |
| PC3       | 8  | 7279.52   | 909.94   | 1.21    | 0.30    | 6.9        | 91.7        |
| PC4       | 6  | 5918.94   | 986.49   | 1.31    | 0.26    | 5.6        | 97.3        |
| PC5       | 4  | 1864.11   | 466.03   | 0.62    | 0.65    | 1.8        | 99.1        |
| PC6       | 2  | 1000.67   | 500.34   | 0.66    | 0.52    | 0.9        | 100         |
| Residuals | 96 | 72433.14  | 754.51   |         |         |            |             |

AMMI analysis for year 2021:

Response: Plant height

| Source   | Df | Sum Sq  | Mean Sq | F value | Pr(>F)   | Proportion | Accumulated |
|----------|----|---------|---------|---------|----------|------------|-------------|
| ENV      | 7  | 3838.35 | 548.34  | 3.55    | 0.017    |            |             |
| REP(ENV) | 16 | 2473.78 | 154.61  | 3.70    | 2.96E-05 |            |             |
| GEN      | 6  | 6065.40 | 1010.90 | 24.19   | 2.86E-17 |            |             |
| GEN:ENV  | 42 | 6119.65 | 145.71  | 3.49    | 2.26E-07 |            |             |
| PC1      | 12 | 4123.03 | 343.59  | 8.22    | 0        | 67.4       | 67.4        |
| PC2      | 10 | 981.21  | 98.12   | 2.35    | 0.02     | 16         | 83.4        |
| PC3      | 8  | 476.29  | 59.54   | 1.42    | 0.20     | 7.8        | 91.2        |
| PC4      | 6  | 290.16  | 48.36   | 1.16    | 0.33     | 4.7        | 95.9        |
| PC5      | 4  | 224.86  | 56.21   | 1.35    | 0.26     | 3.7        | 99.6        |
| PC6      | 2  | 24.11   | 12.05   | 0.29    | 0.75     | 0.4        | 100         |

|           |     |          |        |
|-----------|-----|----------|--------|
| Residuals | 96  | 4011.10  | 41.78  |
| Total     | 209 | 28627.92 | 136.98 |

Response: Tiller/plant

| Source    | Df  | Sum Sq  | Mean Sq | F value | Pr(>F)   | Proportion | Accumulated |
|-----------|-----|---------|---------|---------|----------|------------|-------------|
| ENV       | 7   | 5070.32 | 724.33  | 28.54   | 6.85E-08 |            |             |
| REP(ENV)  | 16  | 406.14  | 25.38   | 2.66    | 1.71E-03 |            |             |
| GEN       | 6   | 212.14  | 35.36   | 3.70    | 2.38E-03 |            |             |
| GEN:ENV   | 42  | 829.01  | 19.74   | 2.06    | 1.86E-03 |            |             |
| PC1       | 12  | 444.59  | 37.05   | 3.88    | 0.0001   | 53.6       | 53.6        |
| PC2       | 10  | 171.45  | 17.14   | 1.79    | 0.07     | 20.7       | 74.3        |
| PC3       | 8   | 135.79  | 16.97   | 1.78    | 0.09     | 16.4       | 90.7        |
| PC4       | 6   | 68.61   | 11.43   | 1.2     | 0.31     | 8.3        | 99          |
| PC5       | 4   | 5.97    | 1.49    | 0.16    | 0.96     | 0.7        | 99.7        |
| PC6       | 2   | 2.60    | 1.30    | 0.14    | 0.87     | 0.3        | 100         |
| Residuals | 96  | 917.80  | 9.56    |         |          |            |             |
| Total     | 209 | 8264.42 | 39.54   |         |          |            |             |

Response: Grain yield

| Source    | Df  | Sum Sq   | Mean Sq | F value | Pr(>F)  | Proportion | Accumulated |
|-----------|-----|----------|---------|---------|---------|------------|-------------|
| ENV       | 7   | 57562.92 | 8223.27 | 71.64   | 6.9E-11 |            |             |
| REP(ENV)  | 16  | 1836.65  | 114.79  | 1.91    | 2.8E-02 |            |             |
| GEN       | 6   | 1953.79  | 325.63  | 5.42    | 7.3E-05 |            |             |
| GEN:ENV   | 42  | 6695.74  | 159.42  | 2.65    | 4.3E-05 |            |             |
| PC1       | 12  | 3118.25  | 259.85  | 4.33    | 0       | 46.6       | 46.6        |
| PC2       | 10  | 1729.26  | 172.93  | 2.88    | 0.0035  | 25.8       | 72.4        |
| PC3       | 8   | 1226.06  | 153.26  | 2.55    | 0.01    | 18.3       | 90.7        |
| PC4       | 6   | 511.83   | 85.31   | 1.42    | 0.21    | 7.6        | 98.4        |
| PC5       | 4   | 79.59    | 19.90   | 0.33    | 0.86    | 1.2        | 99.5        |
| PC6       | 2   | 30.76    | 15.38   | 0.26    | 0.77    | 0.5        | 100         |
| Residuals | 96  | 5767.85  | 60.08   |         |         |            |             |
| Total     | 209 | 80512.7  | 385.23  |         |         |            |             |

Response: Straw yield

| Source   | Df | Sum Sq    | Mean Sq  | F value | Pr(>F)  | Proportion | Accumulated |
|----------|----|-----------|----------|---------|---------|------------|-------------|
| ENV      | 7  | 202930.29 | 28990.04 | 137.05  | 4.5E-13 |            |             |
| REP(ENV) | 16 | 3384.38   | 211.52   | 1.04    | 4.2E-01 |            |             |
| GEN      | 6  | 11807.57  | 1967.93  | 9.68    | 2.5E-08 |            |             |
| GEN:ENV  | 42 | 51307.62  | 1221.61  | 6.01    | 2.1E-13 |            |             |

|           |    |          |         |       |      |      |      |
|-----------|----|----------|---------|-------|------|------|------|
| PC1       | 12 | 24433.53 | 2036.13 | 10.02 | 0    | 47.6 | 47.6 |
| PC2       | 10 | 14334.85 | 1433.49 | 7.05  | 0    | 27.9 | 75.6 |
| PC3       | 8  | 8773.67  | 1096.71 | 5.4   | 0    | 17.1 | 92.7 |
| PC4       | 6  | 2825.19  | 470.86  | 2.32  | 0.04 | 5.5  | 98.2 |
| PC5       | 4  | 899.90   | 224.98  | 1.11  | 0.36 | 1.8  | 99.9 |
| PC6       | 2  | 40.47    | 20.24   | 0.1   | 0.90 | 0.1  | 100  |
| Residuals | 96 | 19510.63 | 203.24  |       |      |      |      |

#### Descriptive Statistics

| <b>2020</b>   |           |            |             |               |            |           |           |
|---------------|-----------|------------|-------------|---------------|------------|-----------|-----------|
| <b>Traits</b> | <b>CV</b> | <b>Max</b> | <b>Mean</b> | <b>Median</b> | <b>Min</b> | <b>SD</b> | <b>SE</b> |
| <b>PH</b>     | 33.9959   | 145.2      | 70.2225     | 68.3          | 24.8       | 23.8728   | 1.8418    |
| <b>NT</b>     | 25.4004   | 37.2       | 20.1994     | 19.6          | 10         | 5.1307    | 0.3958    |
| <b>GY</b>     | 11.9551   | 133.2      | 103.0929    | 99            | 79         | 12.3249   | 0.9509    |
| <b>SY</b>     | 41.7542   | 276        | 118.9685    | 115.4         | 25.2       | 49.6744   | 3.8325    |
| <b>2021</b>   |           |            |             |               |            |           |           |
| <b>PH</b>     | 49.2021   | 90.8       | 42.7304     | 38.2          | 12         | 21.0242   | 1.6221    |
| <b>NT</b>     | 31.8153   | 40.2       | 20.9729     | 20.8          | 8          | 6.6726    | 0.5148    |
| <b>GY</b>     | 11.511    | 131.4      | 100.8554    | 98.7          | 71.2       | 11.6095   | 0.8957    |
| <b>SY</b>     | 50.2621   | 248.4      | 82.7571     | 72.5          | 26         | 41.5955   | 3.2092    |

Code for name of genotypes and locations grown for two years:

| Genotypes | Genotypes code | Locations        | Environment Code | Year       |
|-----------|----------------|------------------|------------------|------------|
| GSR-48    | G1             | Pindi Bhattian   | E1               | 2020, 2021 |
|           |                | Kala Shah Kaku   | E2               |            |
|           |                | Narowal          | E3               |            |
|           |                | Swat             | E4               |            |
|           |                | Islamabad        | E5               |            |
|           |                | Dera Ismail Khan | E6               |            |
|           |                | Muzaffargarh     | E7               |            |
|           |                | Dokri            | E8               |            |
| GSR-82    | G2             | Pindi Bhattian   | E1               | 2020, 2021 |
|           |                | Kala Shah Kaku   | E2               |            |
|           |                | Narowal          | E3               |            |
|           |                | Swat             | E4               |            |
|           |                | Islamabad        | E5               |            |
|           |                | Dera Ismail Khan | E6               |            |
|           |                | Muzaffargarh     | E7               |            |
|           |                | Dokri            | E8               |            |
| GSR-112   | G3             | Pindi Bhattian   | E1               | 2020, 2021 |
|           |                | Kala Shah Kaku   | E2               |            |
|           |                | Narowal          | E3               |            |
|           |                | Swat             | E4               |            |
|           |                | Islamabad        | E5               |            |
|           |                | Dera Ismail Khan | E6               |            |
|           |                | Muzaffargarh     | E7               |            |
|           |                | Dokri            | E8               |            |
| GSR-252   | G4             | Pindi Bhattian   | E1               | 2020, 2021 |
|           |                | Kala Shah Kaku   | E2               |            |
|           |                | Narowal          | E3               |            |
|           |                | Swat             | E4               |            |
|           |                | Islamabad        | E5               |            |
|           |                | Dera Ismail Khan | E6               |            |
|           |                | Muzaffargarh     | E7               |            |
|           |                | Dokri            | E8               |            |
| GSR-305   | G5             | Pindi Bhattian   | E1               | 2020, 2021 |
|           |                | Kala Shah Kaku   | E2               |            |
|           |                | Narowal          | E3               |            |
|           |                | Swat             | E4               |            |
|           |                | Islamabad        | E5               |            |
|           |                | Dera Ismail Khan | E6               |            |
|           |                | Muzaffargarh     | E7               |            |
|           |                | Dokri            | E8               |            |
| IRRI-6    | G6             | Pindi Bhattian   | E1               | 2020, 2021 |
|           |                | Kala Shah Kaku   | E2               |            |
|           |                | Narowal          | E3               |            |
|           |                | Swat             | E4               |            |
|           |                | Islamabad        | E5               |            |
|           |                | Dera Ismail Khan | E6               |            |
|           |                | Muzaffargarh     | E7               |            |
|           |                | Dokri            | E8               |            |

|                |    |                  |    |            |
|----------------|----|------------------|----|------------|
| KISSAN BASMATI | G7 | Pindi Bhattian   | E1 | 2020, 2021 |
|                |    | Kala Shah Kaku   | E2 |            |
|                |    | Narowal          | E3 |            |
|                |    | Swat             | E4 |            |
|                |    | Islamabad        | E5 |            |
|                |    | Dera Ismail Khan | E6 |            |
|                |    | Muzaffargarh     | E7 |            |
|                |    | Dokri            | E8 |            |
